# Supplementary material for: Lung Function in Traditional Shellfish Divers in Southern Chile—A Cross-Sectional Study
Source: MDPI journal article supplement (doi:10.3390/ijerph182010641), 2021-10-11
Supplement: s1 [file s1]

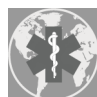

**Supplemental Table S1: Association of diving with lung function retrieved from multiple linear regressions, excluding lung function tests with lower quality according to ERS and ATS guidelines.**

|                              | FVC (n=91) |              |         | FEV <sub>1</sub> (n=91) |              |         | FEV <sub>1</sub> /FVC (n=91) |               |         |
|------------------------------|------------|--------------|---------|-------------------------|--------------|---------|------------------------------|---------------|---------|
|                              | Reg.       | 95%-CI       | p-value | Reg.                    | 95%-CI       | p-value | Reg.                         | 95%-CI        | p-value |
| <b>Divers</b>                | 0.21       | -0.06; 0.47  | 0.132   | 0.10                    | -0.11; 0.32  | 0.341   | -0.01                        | -0.03; 0.01   | 0.344   |
| <b>Age<sup>1</sup></b>       |            |              |         |                         |              |         |                              |               |         |
| 40-49                        | -0.33      | -0.62; -0.04 | 0.025   | -0.28                   | -0.51; -0.05 | 0.020   | -0.002                       | -0.03; 0.02   | 0.845   |
| ≥50                          | -0.57      | -0.90; -0.25 | 0.001   | -0.56                   | -0.82; -0.30 | <0.001  | -0.03                        | -0.05; 0.002  | 0.069   |
| <b>Height<sup>2</sup></b>    | 0.06       | 0.04; 0.08   | <0.001  | 0.04                    | 0.03; 0.06   | <0.001  | -0.001                       | -0.003; 0.001 | 0.249   |
| <b>Smoking</b>               | 0.25       | 0.002; 0.50  | 0.047   | 0.23                    | 0.03; 0.42   | 0.025   | 0.01                         | -0.01; 0.03   | 0.481   |
| <b>Education<sup>3</sup></b> | 0.19       | -0.07; 0.44  | 0.147   | 0.21                    | 0.006; 0.41  | 0.044   | 0.02                         | -0.01; 0.04   | 0.171   |

<sup>1</sup>Reference category: age ≤39 years, <sup>2</sup>measured in cm, <sup>3</sup>Reference category: primary education. Legend: n= number of participants, FVC = forced vital capacity,

FEV<sub>1</sub> = forced expiratory volume in 1 second, FEV<sub>1</sub>/FVC = Tiffeneau Index, Reg.: β-Regression coefficient, 95%-CI: 95%-Confidence interval.

**Supplemental Table S2: Association of diving frequency, diving depth and diving years on lung function in divers only<sup>1</sup>, excluding lung function tests with lower quality according to ERS and ATS guidelines**

|                                     | FVC (n=63) |             |         | FEV <sub>1</sub> (n=63) |             |         | FEV <sub>1</sub> /FVC (n=63) |             |         |
|-------------------------------------|------------|-------------|---------|-------------------------|-------------|---------|------------------------------|-------------|---------|
|                                     | Reg.       | 95%-CI      | p-value | Reg.                    | 95%-CI      | p-value | Reg.                         | 95%-CI      | p-value |
| <b>Diving frequency<sup>2</sup></b> |            |             |         |                         |             |         |                              |             |         |
| 101-200                             | -0.14      | -0.54; 0.26 | 0.490   | -0.10                   | -0.42; 0.21 | 0.508   | 0.004                        | -0.03; 0.04 | 0.779   |
| >200                                | 0.04       | -0.42; 0.50 | 0.865   | 0.09                    | -0.27; 0.45 | 0.635   | 0.02                         | -0.02; 0.05 | 0.375   |
| <b>Diving depth<sup>3</sup></b>     |            |             |         |                         |             |         |                              |             |         |
| ≥30m                                | 0.33       | 0.02; 0.65  | 0.037   | 0.26                    | 0.02; 0.51  | 0.035   | 0.002                        | -0.02; 0.03 | 0.861   |
| <b>Diving years<sup>4</sup></b>     |            |             |         |                         |             |         |                              |             |         |
| >25 years                           | -0.17      | -0.58; 0.24 | 0.410   | -0.09                   | -0.04; 0.23 | 0.565   | 0.01                         | -0.02; 0.04 | 0.589   |

<sup>1</sup>adjusted for age, height, education and height; retrieved from three separate multiple linear regressions, <sup>2</sup>dives/year; reference category: ≤100 dives/year, <sup>3</sup>in m; reference category: <30m, <sup>4</sup>reference category: ≤25 years.

Legend: m=meter, n= number of participants, FVC = forced vital capacity, FEV<sub>1</sub> = forced expiratory volume in 1 second, FEV<sub>1</sub>/FVC = Tiffeneau Index, Reg=  $\beta$ -Regression coefficient, 95%-CI= 95%-Confidence interval.
